# Supplementary material
Source: MDPI journal article supplement (https://www.mdpi.com/2076-3298/8/12/138)
Supplement: s1 [file s1]

Archive with 3 entries (3 files):
- Supplementary Table S1.pdf
- Supplementary Table S2.pdf
- Supplementary Table S3.pdf
