# Supplementary material
Source: MDPI journal article supplement (https://www.mdpi.com/2076-3298/8/12/138)
Supplement: s1 [file s1]

**Supplementary Table S2. The concentration of microplastics found in participants' stool samples.**

| <b>Participant</b> | <b>HDPE</b>  | <b>LDPE</b> | <b>PE</b>   | <b>PP</b>   | <b>PS</b>    | <b>PET</b> |
|--------------------|--------------|-------------|-------------|-------------|--------------|------------|
| <b>C1</b>          | 13,99 + 3,95 | nd          | nd          | nd          | nd           | nd         |
| <b>C2</b>          | nd           | nd          | nd          | nd          | nd           | nd         |
| <b>C3</b>          | nd           | nd          | nd          | nd          | nd           | nd         |
| <b>C4</b>          | 7,19 ± 1,76  | nd          | nd          | 3,13 ± 0,51 | nd           | nd         |
| <b>C5</b>          | nd           | nd          | nd          | nd          | nd           | nd         |
| <b>C6</b>          | 12,27 ± 0,21 | nd          | 7,00 ± 1,25 | nd          | nd           | nd         |
| <b>C7</b>          | 3,33 ± 1,37  | nd          | nd          | nd          | nd           | nd         |
| <b>C8</b>          | nd           | nd          | nd          | nd          | nd           | nd         |
| <b>C9</b>          | nd           | nd          | nd          | nd          | nd           | nd         |
| <b>C0</b>          | nd           | nd          | nd          | nd          | 11,59 ± 2,56 | 2,44 ± 0,3 |
| <b>C11</b>         | nd           | 3,48 ± 1,25 | nd          | nd          | 8,18 ± 2,41  | nd         |
| <b>Average</b>     | 9,195        | 3,48        | 7,00        | 3,13        | 9,89         | 2,44       |
| <b>Prevalence</b>  | 0,364        | 0,091       | 0,091       | 0,091       | 0,182        | 0,091      |

nd: not detected
