# Supplementary material
Source: MDPI journal article supplement (https://www.mdpi.com/2076-3298/8/12/138)
Supplement: s1 [file s1 › Supplementary Table S1.pdf]

**Supplementary Table S1. Summary of data collected from interview with participants and the total of microplastics found in each stool sample.**

| Population                                   | Code | Gender | Age | Frequency of seafood consumption* | Frequency of consuming food with plastic packaging* | Mean of total microplastics found in fecal sample (µg/g) |
|----------------------------------------------|------|--------|-----|-----------------------------------|-----------------------------------------------------|----------------------------------------------------------|
| <b>Kenjeran</b>                              | C1   | Male   | 29  | 3                                 | 18                                                  | 13,99398                                                 |
|                                              | C2   | Male   | 41  | 9                                 | 28                                                  | 0                                                        |
|                                              | C3   | Male   | 20  | 3                                 | 20                                                  | 0                                                        |
|                                              | C4   | Male   | 40  | 2                                 | 14                                                  | 10,3248                                                  |
|                                              | C5   | Female | 41  | 2                                 | 28                                                  | 0                                                        |
|                                              | C6   | Male   | 41  | 10                                | 13                                                  | 19,27168                                                 |
|                                              | C7   | Male   | 39  | 5                                 | 31                                                  | 3,33086                                                  |
|                                              | C8   | Female | 40  | 3                                 | 5                                                   | 0                                                        |
|                                              | C9   | Male   | 25  | 4                                 | 20                                                  | 0                                                        |
|                                              | C10  | Male   | 34  | 0                                 | 7                                                   | 14,0301                                                  |
|                                              | C11  | Male   | 34  | 5                                 | 7                                                   | 11,65138                                                 |
| Pearson correlation with total microplastics |      |        |     | 0.121; p-value= 0.722             | -0.496; p-value= 0.12                               |                                                          |

\* the data were collected daily for 1 week before stool samples collection
